# Supplementary material
Source: PubMed Central journal article supplement (PMC3616680)
Supplement: chest_143_4_1044_ds01.pdf [file chest_143_4_1044_ds01.pdf]

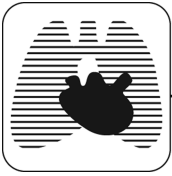

### Complications, Consequences, and Practice Patterns of Endobronchial Ultrasound-Guided Transbronchial Needle Aspiration

#### Results of the AQuIRE Registry

George A. Eapen, MD, FCCP; Archan M. Shah, MD; Xiudong Lei, PhD; Carlos A. Jimenez, MD, FCCP; Rodolfo C. Morice, MD, FCCP; Lonny Yarmus, DO, FCCP; Joshua Filner, MD; Cynthia Ray, MD; Gaetane Michaud, MD, FCCP; Sara R. Greenhill, MD, FCCP; Mona Sarkiss, MD, PhD; Roberto Casal, MD; David Rice, MD; and David E. Ost MD, FCCP; on behalf of the American College of Chest Physicians Quality Improvement Registry, Education, and Evaluation (AQuIRE) Participants

#### e-Appendix 1.

#### IRB APPROVAL DATA:

Note: Some Institutional Review Boards do not review Quality Improvement Registries. The AQuIRE Registry is an example of such a prospectively collected, de-identified quality improvement database.

| Institution                          | IRB Name         | Protocol Approval Number |
|--------------------------------------|------------------|--------------------------|
| U.T. MD Anderson Cancer Center       | MDACC IRB 4      | DR09-0101                |
| Johns Hopkins University             | JHM-IRB X        | NA_00049720              |
| Kaiser Permanente Northwest          | KPNW IRB         | Pro00001301              |
| Henry Ford Hospital                  | HFH IRB          | D4054                    |
| Chicago Chest Center                 | ABMC and CDH IRB | Exempt                   |
| Beth Israel Deaconess Medical Center | BIDMC IRB        | Exempt                   |

*Online supplements are not copyedited prior to posting.*



**e-Table 1—Outcomes by Hospital**

| Outcome                               | Hospital          |                  |                   |                   |                |                  |                         |
|---------------------------------------|-------------------|------------------|-------------------|-------------------|----------------|------------------|-------------------------|
|                                       | No. (%)           |                  |                   |                   |                |                  |                         |
|                                       | A<br>(n =<br>201) | B<br>(n =<br>88) | C<br>(n =<br>153) | D<br>(n =<br>570) | E<br>(n = 213) | F<br>(n =<br>92) | Total<br>(N =<br>1,317) |
| <b>Complications*<sup>†</sup></b>     |                   |                  |                   |                   |                |                  |                         |
| <b>No</b>                             | 200<br>(99.5)     | 86<br>(97.73)    | 150<br>(98.04)    | 563<br>(98.77)    | 210<br>(98.59) | 89<br>(96.74)    | 1298                    |
| <b>Yes</b>                            | 1<br>(0.50)       | 2<br>(2.27)      | 3<br>(1.96)       | 7<br>(1.23)       | 3<br>(1.41)    | 3<br>(3.26)      | 19<br>(1.44)            |
| <b>Escalation in care<sup>‡</sup></b> |                   |                  |                   |                   |                |                  |                         |
| <b>No</b>                             | 200<br>(99.50)    | 88<br>(100)      | 153<br>(100)      | 564<br>(98.95)    | 210<br>(98.59) | 88<br>(95.66)    | 1,303<br>(98.94)        |
| <b>Yes</b>                            | 1<br>(0.49)       | 0<br>(0)         | 0<br>(0)          | 6<br>(1.05)       | 3<br>(1.41)    | 4<br>(4.35)      | 14<br>(1.06)            |

\* Any complication occurring within 24 hours. <sup>†</sup>Fisher exact  $P = 0.37$ . <sup>‡</sup>Fisher exact  $P = 0.07$ .



**e-Table 2—Multivariate Hierarchical Logistic Regression Models**

| <b>Outcome and Covariates</b>                                             | <b>OR</b> | <b>95% CI</b> | <b><i>P</i><br/>Value</b> |
|---------------------------------------------------------------------------|-----------|---------------|---------------------------|
| Outcome: 24-h morbidity                                                   |           |               |                           |
| Transbronchial biopsy: yes vs no                                          | 2.85      | 0.75-10.3     | 0.09                      |
| Outcome: 24-h pneumothorax                                                |           |               |                           |
| Transbronchial biopsy: yes vs no                                          | 15.49     | 1.79-134.42   | 0.022                     |
| Outcome: escalation in level of care                                      |           |               |                           |
| Age: > 70 y vs ≤ 70 y                                                     | 3.75      | 0.89-15.85    | 0.06                      |
| Service: inpatient vs outpatient                                          | 4.71      | 0.76-29.16    | 0.08                      |
| Anesthesia type: deep sedation or general anesthesia vs moderate sedation | 5.85      | 0.59-57.9     | 0.10                      |

*Online supplements are not copyedited prior to posting.*



**e-Table 3—ROSE and Transbronchial Biopsy Utilization by Hospital**

| Practice Pattern              | Hospital*      |               |                |                |                |               | Total<br>(n =<br>1,317) |
|-------------------------------|----------------|---------------|----------------|----------------|----------------|---------------|-------------------------|
|                               | A<br>(n = 201) | B<br>(n = 88) | C<br>(n = 153) | D<br>(n = 570) | E<br>(n = 213) | F<br>(n = 92) |                         |
| <b>ROSE*</b>                  |                |               |                |                |                |               |                         |
| <b>No</b>                     | 198<br>(98.5)  | 9<br>(10.2)   | 20<br>(13.1)   | 0<br>(0)       | 9<br>(4.2)     | 83<br>(90.2)  | 319<br>(24.2)           |
| <b>Yes</b>                    | 3<br>(1.5)     | 79<br>(89.8)  | 133<br>(86.9)  | 570<br>(100)   | 204<br>(95.8)  | 9<br>(9.8)    | 998<br>(75.8)           |
| <b>Transbronchial biopsy*</b> |                |               |                |                |                |               |                         |
| <b>No</b>                     | 168<br>(83.6)  | 61<br>(69.3)  | 88<br>(57.5)   | 545<br>(95.6)  | 184<br>(86.4)  | 84<br>(91.3)  | 1,130<br>(85.8)         |
| <b>Yes</b>                    | 33<br>(16.4)   | 27<br>(30.7)  | 65<br>(42.5)   | 25<br>(4.4)    | 29<br>(13.6)   | 8<br>(8.7)    | 187<br>(14.2)           |

ROSE = rapid on-site cytologic evaluation

\*Fisher exact  $P < 0.001$ .



**e-Table 4—Utilization of Transbronchial Biopsy by Hospital when Rapid Onsite Cytologic Evaluation Was Used**

| Hospital     | EBUS-TBNA no specific diagnosis made* |                    | EBUS-TBNA specific diagnosis made <sup>†</sup> |                    |
|--------------|---------------------------------------|--------------------|------------------------------------------------|--------------------|
|              | TBBx performed<br>No. (%)             | No TBBx<br>No. (%) | TBBx performed<br>No. (%)                      | No TBBx<br>No. (%) |
| <b>A</b>     | 1 (50)                                | 1 (50)             | 0 (0)                                          | 1 (100)            |
| <b>B</b>     | 17 (40)                               | 26 (60)            | 5 (14)                                         | 31 (86)            |
| <b>C</b>     | 35 (45)                               | 42 (55)            | 18 (32)                                        | 38 (68)            |
| <b>D</b>     | 16 (6)                                | 248 (94)           | 9 (3)                                          | 297 (97)           |
| <b>E</b>     | 24 (26)                               | 68 (74)            | 1 (1)                                          | 111 (99)           |
| <b>F</b>     | 0 (0)                                 | 3 (100)            | 0 (0)                                          | 6 (100)            |
| <b>Total</b> | 93 (19)                               | 388 (81)           | 33 (6)                                         | 484 (94)           |

EBUS-TBNA = endobronchial ultrasound-guided transbronchial needle aspiration; TBBx = transbronchial biopsy.

\*Fisher exact  $P < 0.001$  comparison for between hospital differences in use of TBBx when no specific diagnosis was made by EBUS-TBNA.

<sup>†</sup> $P < 0.001$  comparison for between hospital differences in use of TBBx when a specific diagnosis was made by EBUS-TBNA.



**e-Table 5. Utilization of Transbronchial Biopsy by Hospital when Rapid Onsite Cytologic Evaluation Was not Used**

| Hospital*    | EBUS-TBNA no specific diagnosis made <sup>†</sup> |                    | EBUS-TBNA specific diagnosis made <sup>‡</sup> |                    |
|--------------|---------------------------------------------------|--------------------|------------------------------------------------|--------------------|
|              | TBBx performed<br>No. (%)                         | No TBBx<br>No. (%) | TBBx performed<br>No. (%)                      | No TBBx<br>No. (%) |
| <b>A</b>     | 17 (18)                                           | 80 (82)            | 15 (15)                                        | 86 (85)            |
| <b>B</b>     | 2 (33)                                            | 4 (67)             | 1 (33)                                         | 2 (67)             |
| <b>C</b>     | 5 (36)                                            | 9 (64)             | 3 (50)                                         | 3 (50)             |
| <b>E</b>     | 4 (50)                                            | 4 (50)             | 0 (0)                                          | 1 (100)            |
| <b>F</b>     | 5 (11)                                            | 40 (89)            | 3 (8)                                          | 35 (92)            |
| <b>Total</b> | 39 (23)                                           | 131 (77)           | 22 (15)                                        | 127 (85)           |

EBUS-TBNA = endobronchial ultrasound-guided transbronchial needle aspiration; TBBx = transbronchial biopsy.

\*Hospital D performed all procedures with rapid onsite evaluation so they are not included here.

<sup>†</sup>Fisher exact  $P < 0.001$  comparison for between hospital differences in use of TBBx when no specific diagnosis was made by EBUS-TBNA.

<sup>‡</sup>Fisher exact for sites with more than 5 cases  $P < 0.001$  comparison for between hospital differences in use of TBBx when a specific diagnosis was made by EBUS-TBNA.
